# Supplementary material for: Targeted Nanostructured Lipid Carrier Containing Galangin as a Promising Adjuvant for Improving Anticancer Effects of Chemotherapeutic Agents
Source: Research Square preprint supplement (doi:10.21203/rs.3.rs-600166/v1), 2021-06-17
Supplement: Supplementary file 1 [file 007ea5548ea8b06e0ff4bbe5.xlsx]

## Sheet: ABCB1
Insert your data in yellow cells only, the rest is calculated
	target gene				reference gene
PCR efficiency	1.95			mean	1.93			mean					mean
Ct values	Ct target A	Ct target B	Ct target C	Ct target	Ct ref. A	Ct ref. B	Ct ref. C	Ct reference		fold of control A	fold of control B	fold of control C	fold of control	SD
control	23.22	23.73		23.475	22.43	23.32		22.875		1	1		1	0
GA	24.83	24.02		24.425	23.62	22.98		23.3		0.746204	0.658871		0.702537	0.0617535
GA loaeded NLC-RGD	25.49	24.95		25.22	22.69	23.27		22.98		0.260535	0.42843		0.344483	0.11872

## Sheet: ABCC1
Insert your data in yellow cells only, the rest is calculated
	target gene				reference gene
PCR efficiency	1.84			mean	1.93			mean					mean
Ct values	Ct target A	Ct target B	Ct target C	Ct target	Ct ref. A	Ct ref. B	Ct ref. C	Ct reference		fold of control A	fold of control B	fold of control C	fold of control	SD
control	24.06	24.43		24.245	22.43	23.32		22.875		1	1		1	0
GA	25.47	24.51		24.99	23.62	22.98		23.3		0.925593	0.761597		0.843595	0.115963
GA loaded-NLC-RGD	24.89	25.32		25.105	22.69	23.27		22.98		0.715231	0.562386		0.638808	0.108078

## Sheet: ABCC2
Insert your data in yellow cells only, the rest is calculated
	target gene				reference gene
PCR efficiency	1.81			mean	1.93			mean					mean
Ct values	Ct target A	Ct target B	Ct target C	Ct target	Ct ref. A	Ct ref. B	Ct ref. C	Ct reference		fold of control A	fold of control B	fold of control C	fold of control	SD
control	23.59	22.95		23.27	22.43	23.32		22.875		1	1		1	0
GA	25.08	23.19		24.135	23.62	22.98		23.3		0.903383	0.693534		0.798459	0.148386
GA loaded-NLC-RGD	25.01	23.75		24.38	22.69	23.27		22.98		0.510906	0.601976		0.556441	0.064396

## Sheet: ABCG2
Insert your data in yellow cells only, the rest is calculated
	target gene				reference gene
PCR efficiency	1.79			mean	1.93			mean					mean
Ct values	Ct target A	Ct target B	Ct target C	Ct target	Ct ref. A	Ct ref. B	Ct ref. C	Ct reference		fold of control A	fold of control B		fold of control	SD
control	22.29	22.5		22.395	22.43	23.32		22.875		1	1		1	0
GA	23.28	22.14		22.71	23.62	22.98		23.3		1.22882	0.986138		1.10748	0.171603
GA loaded NLC-RGD	22.37	22.95		22.66	22.69	23.27		22.98		1.13244	0.744626		0.938535	0.274229
